# Supplementary material for: Impact cratering in sand: comparing solid and liquid intruders
Source: Royal Society of Chemistry journal article supplement (doi:10.1039/d0sm01579b), 2020-10-30
Supplement: d0sm01579b1.pdf [file d0sm01579b1.pdf]

## SUPPLEMENTARY MATERIAL

### Impact cratering in sand: Comparing solid and liquid intruders<sup>†</sup>

Rianne de Jong,<sup>a</sup> Song-Chuan Zhao,<sup>\*a,b</sup> Diana García-González,<sup>a</sup> , Gijs Verduijn,<sup>a</sup> and Devaraj van der Meer<sup>a</sup>

In this Supplementary Material we compare, for the impact of a water droplet on a granular substrate, the final crater diameter with the maximum spreading diameter of the droplet.

In the main text, we claimed that the final crater diameter  $D_c^\infty$  is not related to the maximum droplet spreading diameter  $D_d^*$ . Here, we provide evidence for this statement.

In an earlier paper<sup>1</sup> we found that both the transient crater diameter  $D_c^*$ , measured at the moment that the maximum crater depth is reached, and the final crater diameter  $D_c^\infty$  collapse onto a single curve when plotted against the sand deformation energy  $E_s$  and definitely not when using the droplet deformation energy  $E_d = E_k - E_s$  for variation in packing fraction. On the other hand<sup>2</sup>, we used precisely the droplet deformation energy  $E_d$  to obtain a modified Weber number that collapses the maximum droplet spreading diameter  $D_d^*$ . In addition, we observed that droplet spreading is greatly reduced when mixing between liquid and grains becomes important, i.e., when wettability of the grains and their size are increased<sup>3</sup>. The above discussion alone already indicates that for droplet impact on a granular substrate droplet spreading and crater formation can be considered largely unrelated processes.

In addition, we are however able to directly compare the maximum droplet spreading diameter  $D_d^*$  with the final crater diameter  $D_c^\infty$  for a large subset of our earlier experiments<sup>1-3</sup> and the current paper. Here, we not only include the hydrophobic grains of 114 and 200  $\mu\text{m}$  that were used in the main text of this article, but also hydrophilic ceramic beads of three sizes (98, 167 and 257  $\mu\text{m}$ ) and two types of wettabilities, for which we found<sup>3</sup> that the maximum droplet spreading diameter  $D_d^*$  is greatly reduced when mixing between liquid and grains is important, with no measurable effect on the crater diameter.

In Fig. 1a we plot the dimensionless final crater diameter  $D_c^\infty/D_0$  (with  $D_0$  the droplet diameter) as a function of the di-

mensionless sand deformation energy  $E_s/E_g$ , defined as

$$\frac{E_s}{E_g} = \frac{Z_c^*}{\frac{1}{2}D_0 + Z_c^*} \frac{E_k}{E_g} = \frac{Z_c^*}{\frac{1}{2}D_0 + Z_c^*} \frac{\rho_i}{2\rho_g\phi_0} \frac{U_0^2}{gD_0}, \quad (1)$$

where  $U_0$  is the impact velocity of the droplet,  $Z_c^*$  the maximum crater depth,  $E_k = \frac{1}{12}\pi\rho_i D_0^3 U_0^2$  the kinetic energy of the droplet,  $E_g = \frac{1}{6}\pi\rho_s\phi_0 D_0^4$  a gravitational potential energy scale based on the droplet diameter,  $\rho_i$  and  $\phi_0\rho_g$  the (bulk) densities of impacting droplet and granular bed respectively,  $\phi_0$  the packing fraction of the bed, and  $g$  the gravitational acceleration. Clearly, this leads to a reasonable collapse of the data, regardless of properties like wettability and surface tension.

In Fig. 1b we plot the dimensionless maximum spreading diameter  $D_d^*/D_0$  of the droplet versus the modified Weber number  $We^\dagger$ , which is defined as

$$We^\dagger = \frac{E_d}{E_\sigma} = \frac{\frac{1}{2}D_0}{\frac{1}{2}D_0 + Z_c^*} \frac{E_k}{E_\sigma} = \frac{\frac{1}{2}D_0}{\frac{1}{2}D_0 + Z_c^*} \frac{\rho_i U_0^2 D_0}{\sigma}, \quad (2)$$

where  $E_d$  is the droplet deformation energy,  $E_\sigma = \frac{1}{12}\pi\sigma D_0^2$  a surface energy scale based on the droplet diameter, and  $\sigma$  the surface tension of the droplet air interface\*. In this figure, the data do not collapse at all, which can be explained from the important role of wettability and grain size of the granular bed<sup>3</sup>. Note that the sand deformation energy  $E_s$  and the droplet deformation energy  $E_d$  decompose the impact kinetic energy  $E_k$ :

$$E_s + E_d = \left( \frac{Z_c^*}{\frac{1}{2}D_0 + Z_c^*} E_k \right) + \left( \frac{\frac{1}{2}D_0}{\frac{1}{2}D_0 + Z_c^*} E_k \right) = E_k.$$

If the crater diameter  $D_c^\infty$  would be related to the maximum droplet spreading diameter  $D_d^*$ , as postulated in the literature<sup>4-6</sup>, we expect that when we plot these two length scales against

<sup>a</sup> Physics of Fluids Group, Faculty of Science and Technology, University of Twente, PO Box 217, 7500 AE Enschede, The Netherlands.

<sup>b</sup> State Key Laboratory for Strength and Vibration of Mechanical Structures, School of Aerospace, Xian Jiaotong University, Xi'an, Shaanxi, China.

\* Note that the second fraction on the right hand side of Eq (2) is the conventional Weber number  $We = \rho_i U_0^2 D_0 / \sigma$

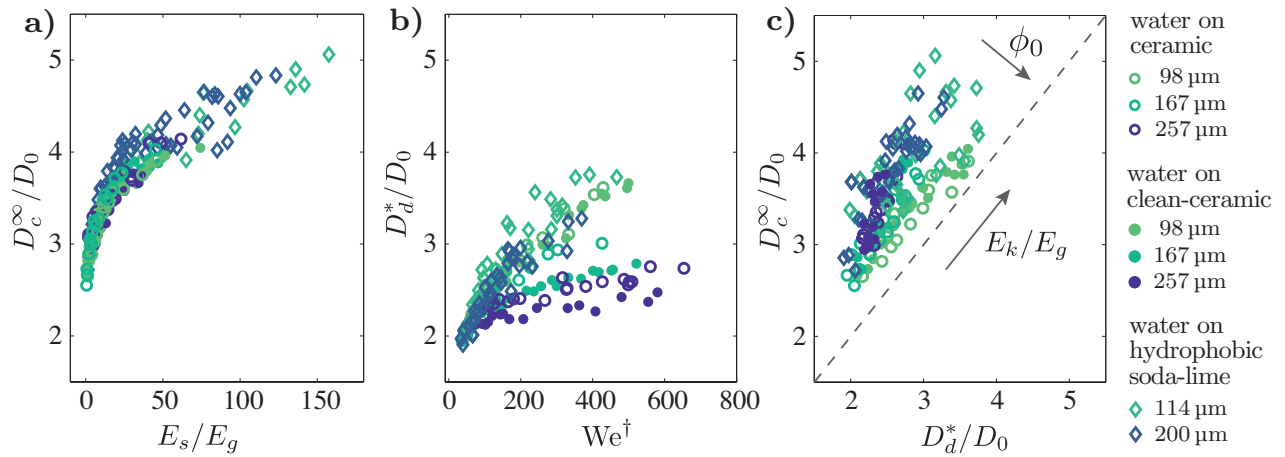

**Fig. 1** (a) The dimensionless maximum crater diameter  $D_c^\infty/D_0$  plotted versus the dimensionless sand deformation energy  $E_s/E_g$  collapses all data for water droplet impact on various substrates onto a single curve. (b) The dimensionless maximum droplet spreading diameter  $D_d^*/D_0$  is plotted against the modified Weber number  $We^\dagger$  for the same data set, which does not lead to data collapse. (c) The dimensionless final crater diameter  $D_c^\infty/D_0$  is plotted against the dimensionless maximum droplet spreading diameter  $D_d^*/D_0$ . The arrows indicate the directions of increasing packing fraction  $\phi_0$  and increasing dimensionless impact energy  $E_k/E_g$ , and the black dashed line indicates  $D_c^\infty = D_d^*$ . Clearly,  $D_c^\infty$  is always larger than  $D_d^*$ , but a simple relation between the two quantities does not exist.

each other, they would collapse onto a single curve. However, as clearly follows from Fig. 1c, the data of  $D_c^\infty/D_0$  versus  $D_d^*/D_0$  presents considerable scatter. This is direct evidence that the hypothesis that maximum droplet spreading and final crater diameter are related, does not hold. In fact, the only thing that can be concluded from the data in Fig. 1c is that the final crater diameter is always observed to be larger than the maximum droplet spreading diameter, where equality of these two quantities is given by the dashed black line in the plot.

## Notes and references

1 R. de Jong, S. C. Zhao and D. van der Meer, *Phys. Rev. E*, 2017, **95**, 042901.

- 2 S. C. Zhao, R. de Jong and D. van der Meer, *Soft Matter*, 2015, **11**, 6562–6568.
- 3 S. C. Zhao, R. de Jong and D. van der Meer, *Phys. Rev. Lett.*, 2017, **118**, 054502.
- 4 H. Katsuragi, *Phys. Rev. Lett.*, 2010, **104**, 218001.
- 5 G. Delon, D. Terwagne, S. Dorbolo, N. Vandewalle and H. Caps, *Phys. Rev. E*, 2011, **84**, 046320.
- 6 H. Katsuragi, *Physics of Soft Impact and Cratering*, Springer Japan, 2016.
